# Supplementary material for: NH3absorption in Brønsted acidic imidazolium- and ammonium-based ionic liquids
Source: Royal Society of Chemistry journal article supplement (doi:10.1039/d0nj04743k), 2020-01-01
Supplement: d0nj04743k1.pdf [file d0nj04743k1.pdf]

## Supporting Information

# NH<sub>3</sub> absorption in Brønsted acidic imidazolium- and ammonium-based ionic liquids

*Takashi Makino\* and Mitsuhiro Kanakubo*

National Institute of Advanced Industrial Science and Technology, 4-2-1 Nigatake, Miyagino-ku, Sendai 983-8551, Japan

To whom correspondence: [makino.t@aist.go.jp](mailto:makino.t@aist.go.jp) (T.M.)

**Table S1.** NH<sub>3</sub> solubilities per mole of IL  $\alpha_1$ , molarities of NH<sub>3</sub>  $c_1$ , and mole fractions of NH<sub>3</sub>  $x_1$  in the present ILs.<sup>a)</sup>

| $T / \text{K}$                                               | $\alpha_1$        | $c_1 / \text{mol dm}^{-3}$ | $x_1$             |
|--------------------------------------------------------------|-------------------|----------------------------|-------------------|
| [emim][Tf <sub>2</sub> N], $p_1 = 0.101 \text{ MPa}$ , run 1 |                   |                            |                   |
| 283.15                                                       | 0.56 <sub>8</sub> | 2.04                       | 0.36 <sub>2</sub> |
| 298.15                                                       | 0.33 <sub>5</sub> | 1.23                       | 0.25 <sub>1</sub> |
| 313.14                                                       | 0.23 <sub>5</sub> | 0.868                      | 0.19 <sub>1</sub> |
| 333.15                                                       | 0.14 <sub>2</sub> | 0.518                      | 0.12 <sub>4</sub> |
| [emim][Tf <sub>2</sub> N], $p_1 = 0.101 \text{ MPa}$ , run 2 |                   |                            |                   |
| 298.15                                                       | 0.33 <sub>7</sub> | 1.26                       | 0.25 <sub>2</sub> |
| 313.15                                                       | 0.21 <sub>5</sub> | 0.808                      | 0.17 <sub>7</sub> |
| 313.15                                                       | 0.21 <sub>5</sub> | 0.806                      | 0.17 <sub>7</sub> |
| 333.15                                                       | 0.11 <sub>8</sub> | 0.441                      | 0.10 <sub>6</sub> |
| 353.15                                                       | 0.05 <sub>3</sub> | 0.196                      | 0.05 <sub>0</sub> |
| [emim][FAP], $p_1 = 0.101 \text{ MPa}$                       |                   |                            |                   |
| 298.15                                                       | 0.49 <sub>1</sub> | 1.41                       | 0.32 <sub>9</sub> |
| 313.15                                                       | 0.35 <sub>3</sub> | 1.02                       | 0.26 <sub>1</sub> |
| 313.15                                                       | 0.33 <sub>8</sub> | 0.989                      | 0.25 <sub>3</sub> |
| 333.16                                                       | 0.23 <sub>5</sub> | 0.685                      | 0.19 <sub>0</sub> |
| 353.15                                                       | 0.17 <sub>7</sub> | 0.518                      | 0.15 <sub>0</sub> |
| [emim][TfO], $p_1 = 0.101 \text{ MPa}$                       |                   |                            |                   |
| 298.15                                                       | 0.48 <sub>6</sub> | 2.40                       | 0.32 <sub>7</sub> |
| 313.15                                                       | 0.34 <sub>5</sub> | 1.75                       | 0.25 <sub>6</sub> |
| 333.15                                                       | 0.21 <sub>0</sub> | 1.05                       | 0.17 <sub>4</sub> |
| 353.15                                                       | 0.14 <sub>4</sub> | 0.732                      | 0.12 <sub>6</sub> |
| [2OHmim][Tf <sub>2</sub> N], $p_1 = 0.101 \text{ MPa}$       |                   |                            |                   |
| 298.15                                                       | 1.34 <sub>3</sub> | 4.64                       | 0.57 <sub>3</sub> |

|                                                                      |                                 |                    |                                 |
|----------------------------------------------------------------------|---------------------------------|--------------------|---------------------------------|
| 313.15                                                               | 1.06 <sub>7</sub>               | 3.73               | 0.51 <sub>6</sub>               |
| 313.16                                                               | 1.11 <sub>4</sub>               | 3.90               | 0.52 <sub>7</sub>               |
| 333.15                                                               | 0.75 <sub>5</sub>               | 2.69               | 0.43 <sub>0</sub>               |
| 353.15                                                               | 0.52 <sub>6</sub>               | 1.89               | 0.34 <sub>5</sub>               |
| [4SO <sub>3</sub> Hmim][Tf <sub>2</sub> N], $p_1 = 0.101$ MPa        |                                 |                    |                                 |
| 298.15                                                               | 2.22 <sub>8</sub>               | 6.02               | 0.69 <sub>0</sub>               |
| 313.15                                                               | 1.92 <sub>2</sub>               | 5.37               | 0.65 <sub>8</sub>               |
| 313.15                                                               | 1.98 <sub>8</sub>               | 5.56               | 0.66 <sub>5</sub>               |
| 333.15                                                               | 1.53 <sub>0</sub>               | 4.43               | 0.60 <sub>5</sub>               |
| 353.15                                                               | 1.30 <sub>8</sub>               | 3.78               | 0.56 <sub>7</sub>               |
| [4SO <sub>3</sub> Hmim][Tf <sub>2</sub> N], $p_1 = 0.0101$ MPa       |                                 |                    |                                 |
| 298.15                                                               | 1.02 <sub>6</sub> <sup>a)</sup> | 3.17 <sup>a)</sup> | 0.50 <sub>7</sub> <sup>a)</sup> |
| 313.15                                                               | 1.15 <sub>5</sub>               | 3.36               | 0.53 <sub>6</sub>               |
| 333.15                                                               | 1.09 <sub>1</sub>               | 3.16               | 0.52 <sub>2</sub>               |
| 353.15                                                               | 1.02 <sub>6</sub>               | 2.98               | 0.50 <sub>6</sub>               |
| [4SO <sub>3</sub> Hmim][HSO <sub>4</sub> ], $p_1 = 0.0101$ MPa       |                                 |                    |                                 |
| 333.15                                                               | 0.83 <sub>3</sub>               | 3.58               | 0.45 <sub>4</sub>               |
| 353.15                                                               | 0.52 <sub>7</sub>               | 2.32               | 0.34 <sub>5</sub>               |
| [N <sub>1114</sub> ][Tf <sub>2</sub> N], $p_1 = 0.101$ MPa           |                                 |                    |                                 |
| 313.15                                                               | 0.25 <sub>8</sub>               | 0.857              | 0.20 <sub>5</sub>               |
| 313.15                                                               | 0.25 <sub>7</sub>               | 0.850              | 0.20 <sub>4</sub>               |
| 333.15                                                               | 0.16 <sub>5</sub>               | 0.549              | 0.14 <sub>2</sub>               |
| 353.15                                                               | 0.10 <sub>3</sub>               | 0.334              | 0.09 <sub>3</sub>               |
| [N <sub>111,2OH</sub> ][Tf <sub>2</sub> N], $p_1 = 0.101$ MPa, run 1 |                                 |                    |                                 |
| 283.47                                                               | 1.44 <sub>5</sub>               | 5.01               | 0.59 <sub>1</sub>               |
| 298.15                                                               | 1.15 <sub>3</sub>               | 4.04               | 0.53 <sub>6</sub>               |
| 313.15                                                               | 0.85 <sub>6</sub>               | 3.06               | 0.46 <sub>1</sub>               |
| 333.15                                                               | 0.58 <sub>6</sub>               | 2.17               | 0.36 <sub>9</sub>               |

|                                                                      |                   |      |                   |
|----------------------------------------------------------------------|-------------------|------|-------------------|
| 333.15                                                               | 0.61 <sub>7</sub> | 2.28 | 0.38 <sub>1</sub> |
| [N <sub>111,2OH</sub> ][Tf <sub>2</sub> N], $p_1 = 0.101$ MPa, run 2 |                   |      |                   |
| 313.15                                                               | 0.87 <sub>1</sub> | 3.07 | 0.46 <sub>6</sub> |
| 313.15                                                               | 0.89 <sub>0</sub> | 3.15 | 0.47 <sub>1</sub> |
| 353.15                                                               | 0.43 <sub>2</sub> | 1.60 | 0.30 <sub>2</sub> |
| [N <sub>111,1COOH</sub> ][Tf <sub>2</sub> N], $p_1 = 0.101$ MPa      |                   |      |                   |
| 298.15                                                               | 2.42 <sub>0</sub> | 7.71 | 0.70 <sub>8</sub> |
| 313.15                                                               | 2.12 <sub>7</sub> | 7.01 | 0.68 <sub>0</sub> |
| 333.15                                                               | 1.71 <sub>1</sub> | 5.82 | 0.63 <sub>1</sub> |
| 353.15                                                               | 1.48 <sub>0</sub> | 5.06 | 0.59 <sub>7</sub> |
| 353.15                                                               | 1.42 <sub>9</sub> | 4.96 | 0.58 <sub>8</sub> |

a) The standard uncertainties for  $T$  and  $p_1$  were  $u(T)=0.02$  K,  $u(p_1)=0.002$  MPa. The uncertainties for  $\alpha_1$ ,  $x_1$ , and  $c_1$  were  $u(\alpha_1) = 0.02$  or  $u_r(\alpha_1) = 3.4\%$ ,  $u(x_1) = 0.01$  or  $u_r(x_1) = 3.4\%$ , and  $u(c_1) = 0.06$  or  $u_r(c_1) = 3.5\%$ .

**Table S2.**  $^1\text{H}$  and  $^{13}\text{C}$  chemical shifts calculated using a Gaussian 09 with B3LYP/6-311+G(2d,p) basis set.

| $\delta$ / ppm ( $^1\text{H}$ )          |     | $\delta$ / ppm ( $^{13}\text{C}$ ) |     |
|------------------------------------------|-----|------------------------------------|-----|
| <b>[emim]<sup>+</sup></b>                |     |                                    |     |
| a                                        | 7.7 | 1                                  | 137 |
| b                                        | 7.4 | 2                                  | 130 |
| c                                        | 7.3 | 3                                  | 129 |
| d                                        | 4.1 | 4                                  | 51  |
| e                                        | 3.8 | 5                                  | 38  |
| f                                        | 1.5 | 6                                  | 18  |
| <b>[2OHmim]<sup>+</sup></b>              |     |                                    |     |
| a                                        | 7.8 | 1                                  | 138 |
| b                                        | 7.3 | 2                                  | 130 |
| c                                        | 7.3 | 3                                  | 130 |
| d                                        | 4.2 | 4                                  | 66  |
| e                                        | 4.1 | 5                                  | 54  |
| f                                        | 3.8 | 6                                  | 38  |
| g                                        | 0.9 |                                    |     |
| <b>[4SO<sub>3</sub>Hmim]<sup>+</sup></b> |     |                                    |     |
| a                                        | 7.7 | 1                                  | 137 |
| b                                        | 7.4 | 2                                  | 130 |
| c                                        | 7.3 | 3                                  | 130 |
| d                                        | 4.6 | 4                                  | 57  |
| e                                        | 4.0 | 5                                  | 54  |
| f                                        | 3.8 | 6                                  | 38  |
| g                                        | 3.0 | 7                                  | 36  |
| h                                        | 1.9 | 8                                  | 27  |
| i                                        | 1.6 |                                    |     |
| <b>[N<sub>1114</sub>]<sup>+</sup></b>    |     |                                    |     |
| a                                        | 3.0 | 1                                  | 74  |

|   |     |  |   |    |  |
|---|-----|--|---|----|--|
| b | 2.9 |  | 2 | 58 |  |
| c | 2.8 |  | 3 | 52 |  |
| d | 2.8 |  | 4 | 52 |  |
| e | 1.5 |  | 5 | 29 |  |
| f | 1.3 |  | 6 | 24 |  |
| g | 1.1 |  | 7 | 14 |  |

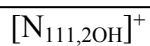

|   |     |  |   |    |  |
|---|-----|--|---|----|--|
| a | 4.1 |  | 1 | 71 |  |
| b | 3.2 |  | 2 | 60 |  |
| c | 3.0 |  | 3 | 58 |  |
| d | 2.8 |  | 4 | 54 |  |
| e | 2.7 |  | 5 | 54 |  |
| f | 0.9 |  |   |    |  |

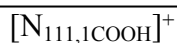

|   |     |  |   |     |  |
|---|-----|--|---|-----|--|
| a | 6.7 |  | 1 | 169 |  |
| b | 3.8 |  | 2 | 65  |  |
| c | 3.3 |  | 3 | 59  |  |
| d | 3.0 |  | 4 | 53  |  |
| e | 2.9 |  | 5 | 53  |  |

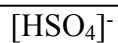

|   |     |
|---|-----|
| a | 8.7 |
|---|-----|

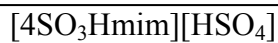

|   |      |  |   |     |  |
|---|------|--|---|-----|--|
| a | 12.0 |  | 1 | 137 |  |
| b | 7.8  |  | 2 | 131 |  |
| c | 7.5  |  | 3 | 128 |  |
| d | 7.2  |  | 4 | 58  |  |
| e | 4.1  |  | 5 | 56  |  |
| f | 3.8  |  | 6 | 39  |  |
| g | 2.9  |  | 7 | 37  |  |
| h | 2.1  |  | 8 | 28  |  |
| i | 1.7  |  |   |     |  |

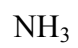

a      -0.22

---

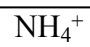

a      4.8

---

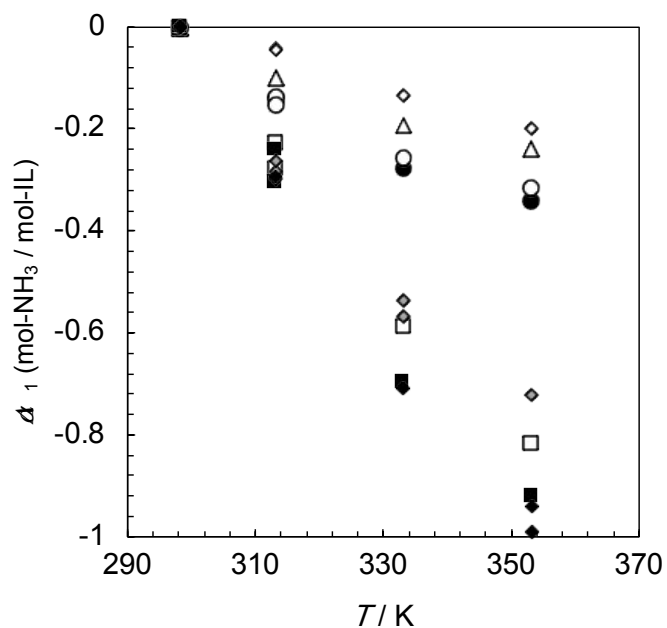

**Fig. S1** Decrements  $\Delta\alpha_1$  of  $\alpha_1$  from 298.15 K by heating.  $\Delta\alpha_1$  is defined as the difference between the  $\text{NH}_3$  solubilities  $\alpha_1$  at certain temperature and 298.15 K. Open triangle, [emim][Tf<sub>2</sub>N]; filled circle, [emim][TfO]; open circle, [emim][FAP]; open diamond, [N<sub>1114</sub>][Tf<sub>2</sub>N]; open square, [2OHmim][Tf<sub>2</sub>N]; filled square, [4SO<sub>3</sub>Hmim][Tf<sub>2</sub>N]; gray diamond, [N<sub>111,2OH</sub>][Tf<sub>2</sub>N]; filled diamond, [N<sub>111,1COOH</sub>][Tf<sub>2</sub>N].



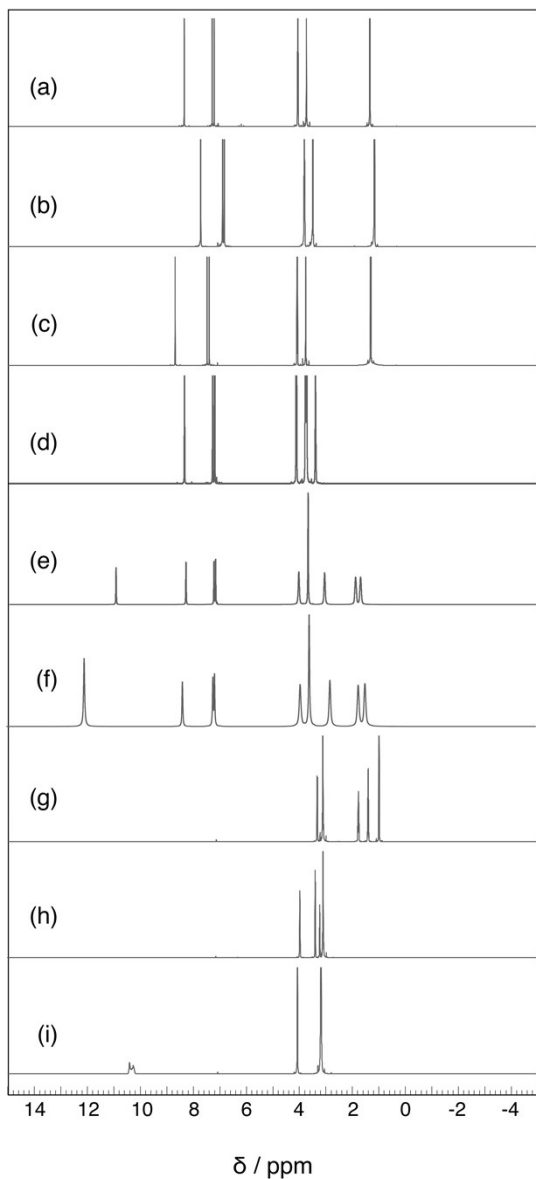

**Fig. S2**  $^1\text{H}$  NMR spectra for the neat ILs at 313.2 K. (a), [emim][Tf<sub>2</sub>N] (vertically enlarged); (b), [emim][FAP] (enlarged); (c), [emim][TfO] (enlarged); (d), [2OHmim][Tf<sub>2</sub>N] (enlarged); (e), [4SO<sub>3</sub>Hmim][Tf<sub>2</sub>N]; (f), [4SO<sub>3</sub>Hmim][HSO<sub>4</sub>] (333.2 K); (g), [N<sub>1114</sub>][Tf<sub>2</sub>N]; (h), [N<sub>111,2OH</sub>][Tf<sub>2</sub>N] (333.2 K); (i), [N<sub>111,1COOH</sub>][Tf<sub>2</sub>N] (343.2 K). The peak of benzene-*d*<sub>6</sub> was referenced to 7.2 ppm.

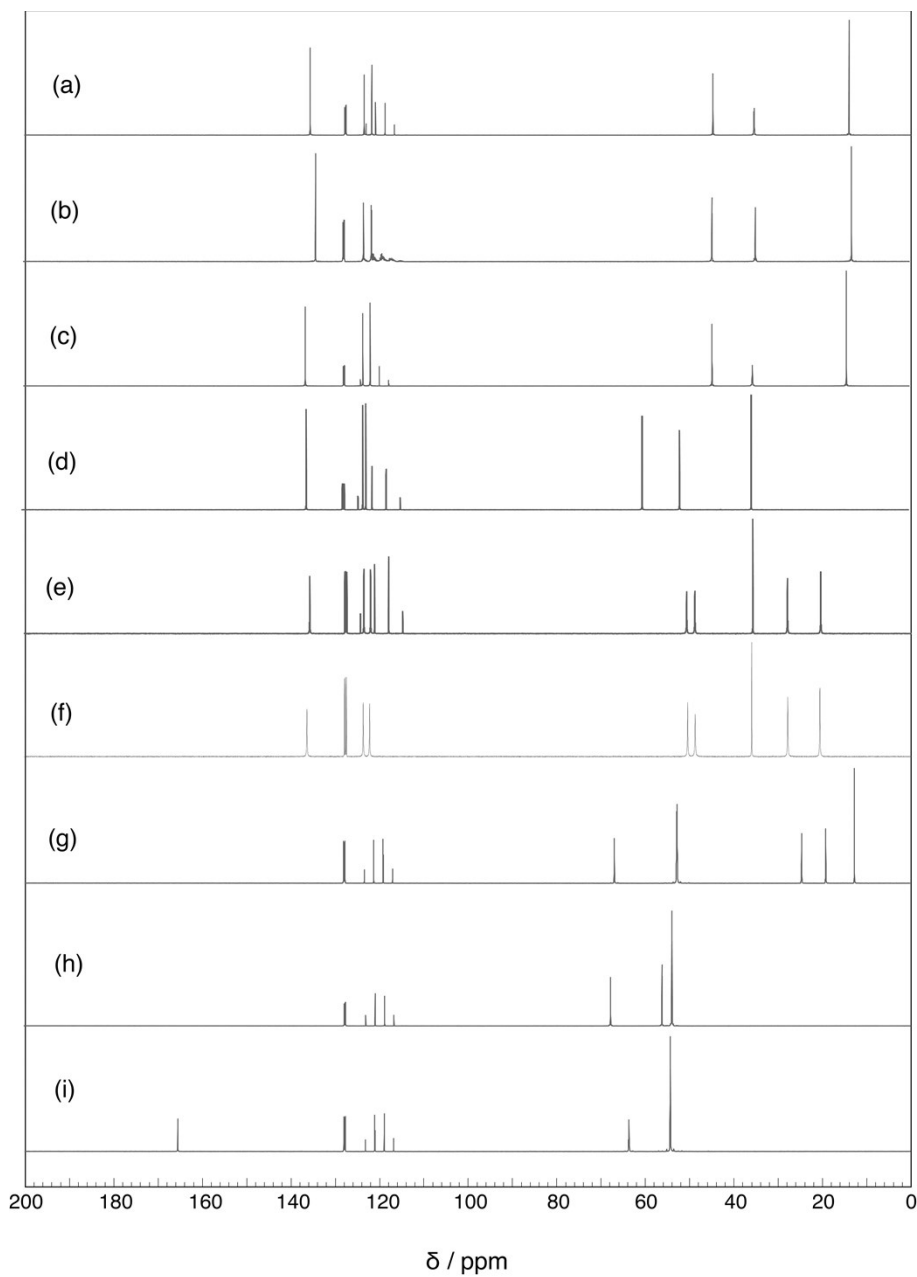

**Fig. S3**  $^{13}\text{C}$  NMR spectra for the neat ILs at 313.2 K. (a), [emim][Tf<sub>2</sub>N] (vertically enlarged); (b), [emim][FAP] (enlarged); (c), [emim][TfO] (enlarged); (d), [2OHmim][Tf<sub>2</sub>N] (enlarged); (e), [4SO<sub>3</sub>Hmim][Tf<sub>2</sub>N]; (f), [4SO<sub>3</sub>Hmim][HSO<sub>4</sub>] (333.2 K); (g), [N<sub>1114</sub>][Tf<sub>2</sub>N]; (h), [N<sub>111,20H</sub>][Tf<sub>2</sub>N] (333.2 K); (i), [N<sub>111,1COOH</sub>][Tf<sub>2</sub>N] (343.2 K). The peak of benzene- $d_6$  was referenced to 128 ppm.

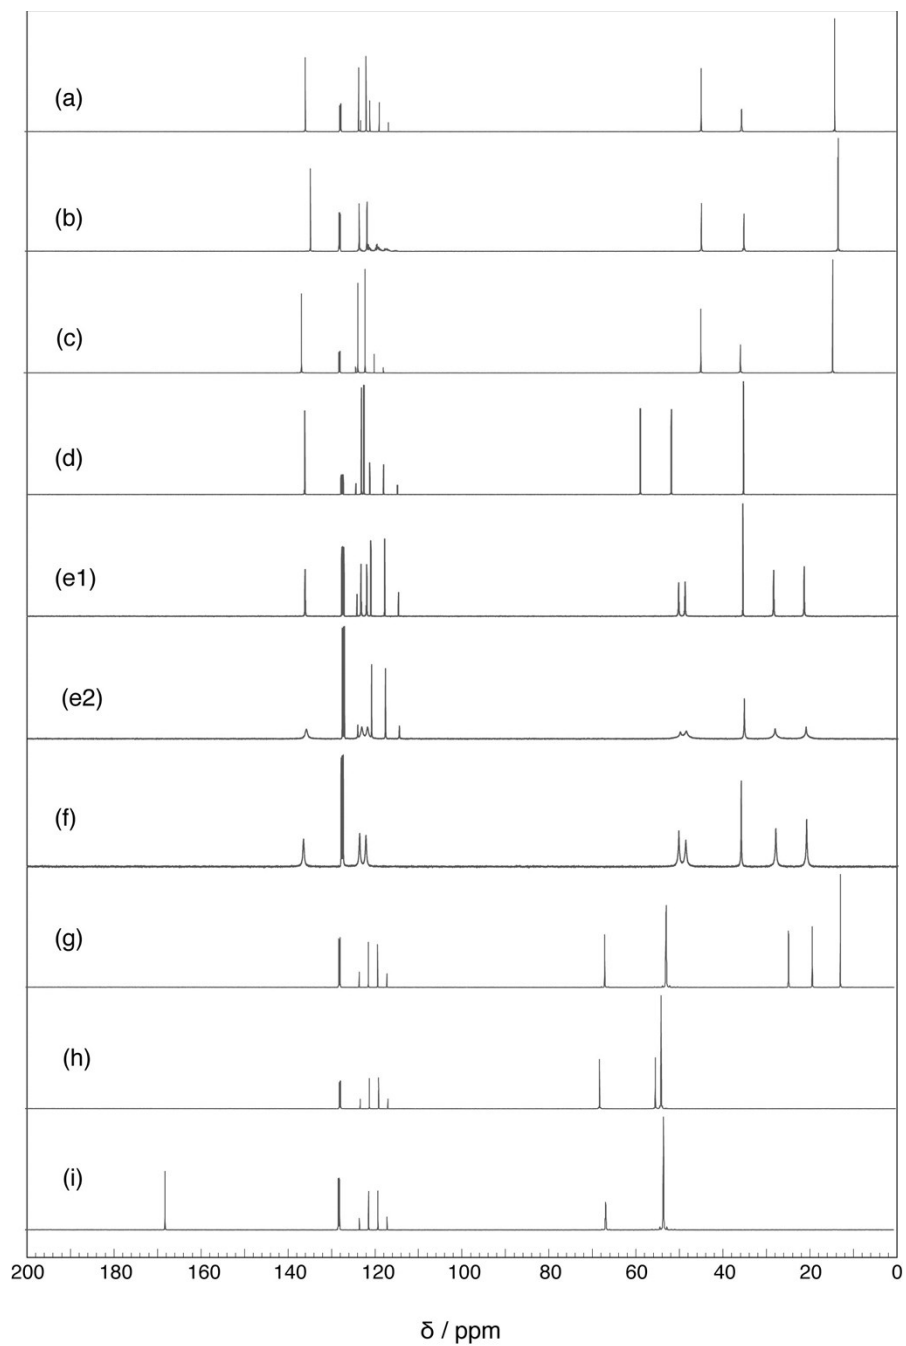

**Fig. S4**  $^{13}\text{C}$  NMR spectra for the  $\text{NH}_3$ -saturated ILs at 313.2 K. (a), [emim][ $\text{Tf}_2\text{N}$ ]; (b), [emim][FAP]; (c), [emim][TfO]; (d), [2OHmim][ $\text{Tf}_2\text{N}$ ]; (e1), [4 $\text{SO}_3\text{Hmim}$ ][ $\text{Tf}_2\text{N}$ ]; (e2), [4 $\text{SO}_3\text{Hmim}$ ][ $\text{Tf}_2\text{N}$ ] ( $p_1=0.0101$  MPa); (f), [4 $\text{SO}_3\text{Hmim}$ ][ $\text{HSO}_4$ ] ( $p_1=0.0101$  MPa); (g), [ $\text{N}_{1114}$ ][ $\text{Tf}_2\text{N}$ ]; (h), [ $\text{N}_{111,20\text{H}}$ ][ $\text{Tf}_2\text{N}$ ]; (i), [ $\text{N}_{111,1\text{COOH}}$ ][ $\text{Tf}_2\text{N}$ ]. The peak of benzene- $d_6$  was referenced to 128 ppm.

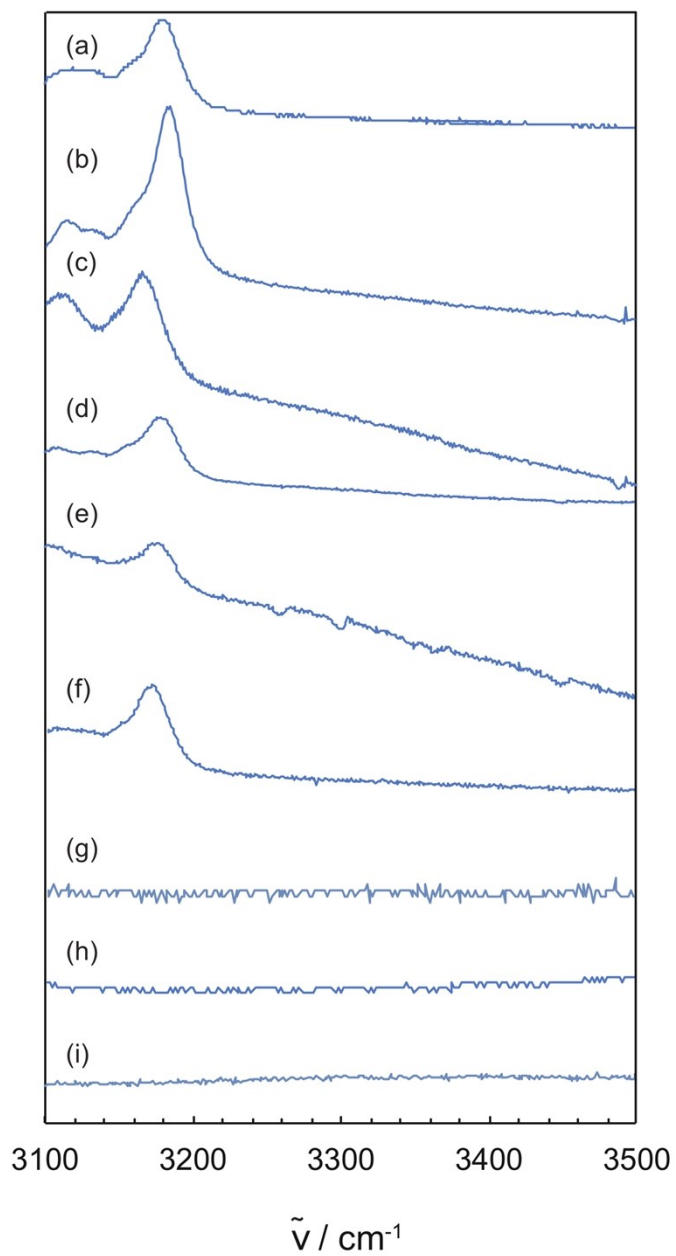

**Fig. S5** Raman spectra ( $3100\text{-}3500\text{ cm}^{-1}$ ) for the neat ILs at  $313.2\text{ K}$ . (a), [emim][Tf<sub>2</sub>N]; (b), [emim][FAP]; (c), [emim][TfO]; (d), [2OHmim][Tf<sub>2</sub>N]; (e), [4SO<sub>3</sub>Hmim][Tf<sub>2</sub>N]; (f), [4SO<sub>3</sub>Hmim][HSO<sub>4</sub>] ( $333.2\text{ K}$ ); (g), [N<sub>1114</sub>][Tf<sub>2</sub>N]; (h), [N<sub>111,2OH</sub>][Tf<sub>2</sub>N] ( $333.2\text{ K}$ ); (i), [N<sub>111,1COOH</sub>][Tf<sub>2</sub>N] ( $343.2\text{ K}$ ).

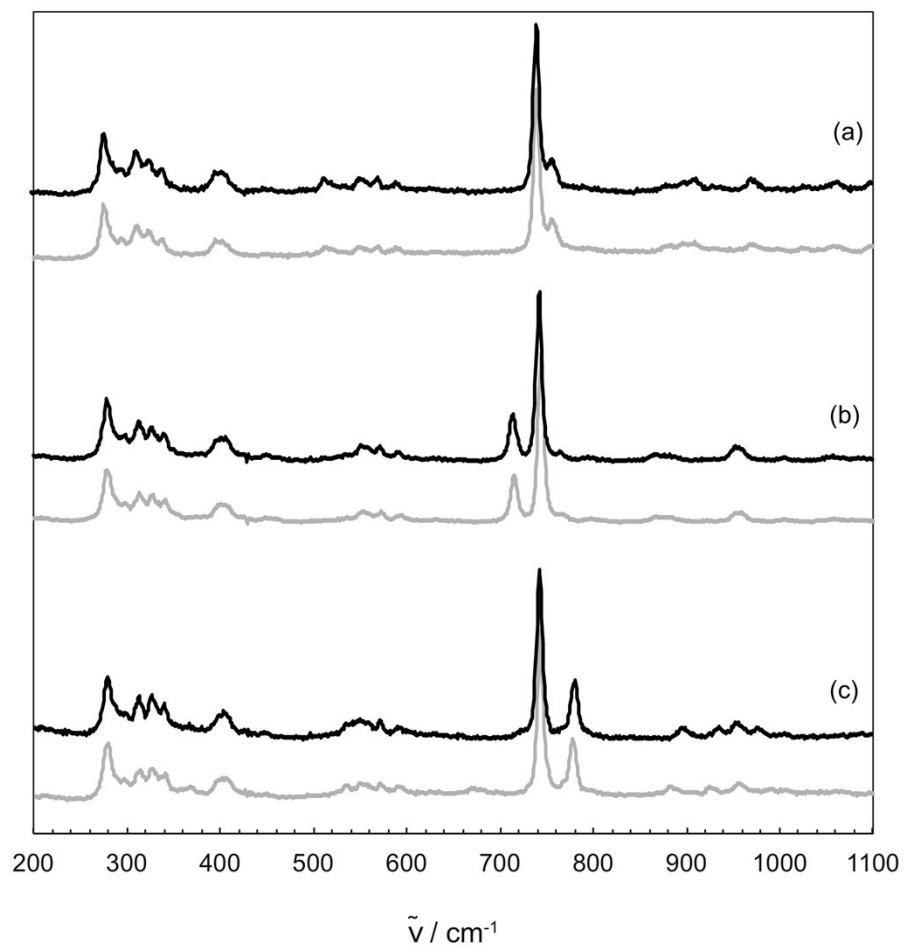

**Fig. S6** Raman spectra (200-1100 cm<sup>-1</sup>) for the ammonium ILs before and after NH<sub>3</sub> absorption at 313.2 K.

Solid, NH<sub>3</sub> saturated; gray, neat. (a) [N<sub>1114</sub>][Tf<sub>2</sub>N]; (b), [N<sub>111,20H</sub>][Tf<sub>2</sub>N]; (c), [N<sub>111,1COOH</sub>][Tf<sub>2</sub>N].

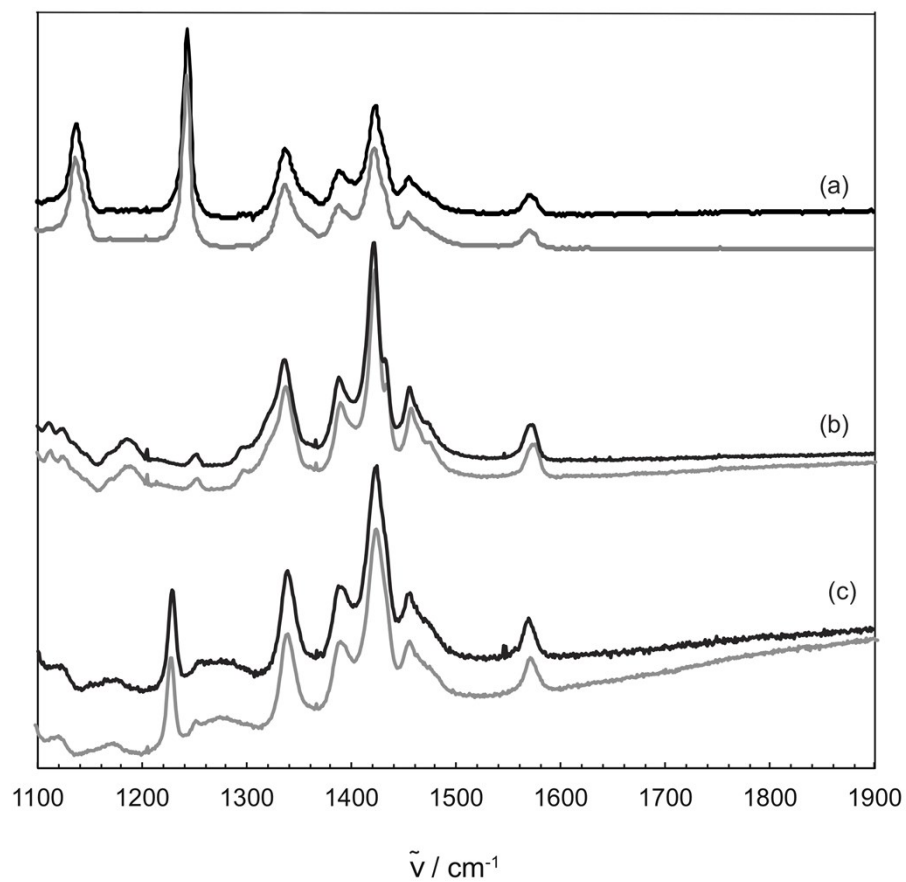

**Fig. S7** Raman spectra (1100-1900  $\text{cm}^{-1}$ ) for the nonfunctionalized-imidazolium ILs before and after  $\text{NH}_3$  absorption at 313.2 K. Solid,  $\text{NH}_3$  saturated; gray, neat. (a) [emim][Tf<sub>2</sub>N]; (b), [emim][FAP]; (c), [emim][TfO].

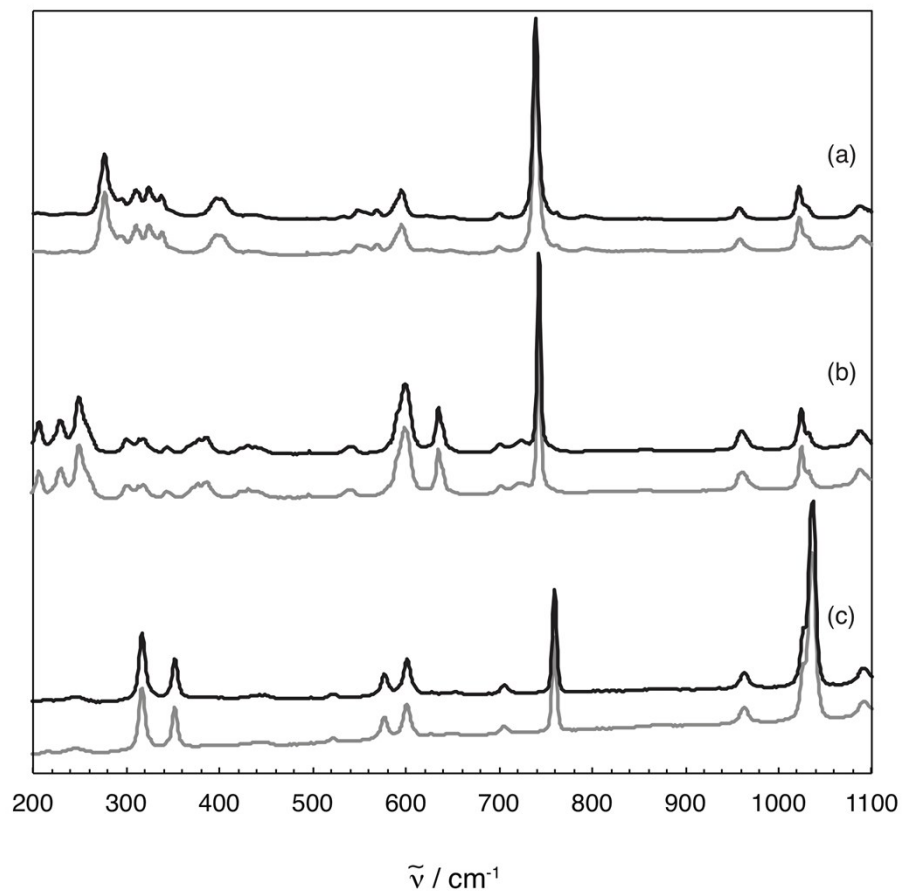

**Fig. S8** Raman spectra (200-1100  $\text{cm}^{-1}$ ) for the nonfunctionalized-imidazolium ILs before and after  $\text{NH}_3$  absorption at 313.2 K. Solid,  $\text{NH}_3$  saturated; gray, neat. (a) [emim][ $\text{Tf}_2\text{N}$ ]; (b), [emim][FAP]; (c), [emim][TfO].

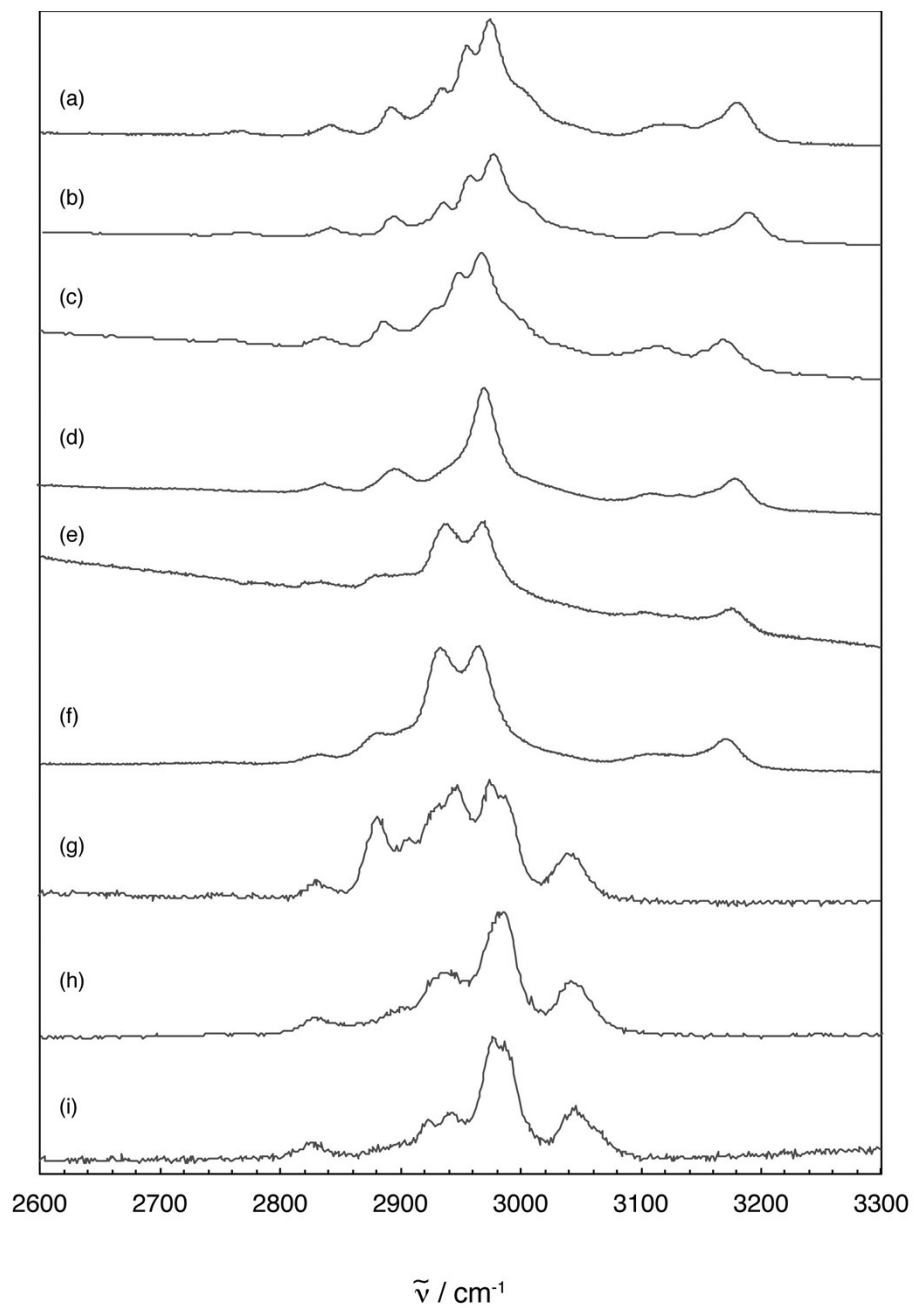

**Fig. S9** Raman spectra (2600-3300  $\text{cm}^{-1}$ ) for the neat ILs at 313.2 K. (a), [emim][Tf<sub>2</sub>N]; (b), [emim][FAP]; (c), [emim][TfO]; (d), [2OHmim][Tf<sub>2</sub>N]; (e), [4SO<sub>3</sub>Hmim][Tf<sub>2</sub>N]; (f), [4SO<sub>3</sub>Hmim][HSO<sub>4</sub>] (333.2 K); (g), [N<sub>1114</sub>][Tf<sub>2</sub>N]; (h), [N<sub>111,2OH</sub>][Tf<sub>2</sub>N] (333.2 K); (i), [N<sub>111,1COOH</sub>][Tf<sub>2</sub>N] (343.2 K).



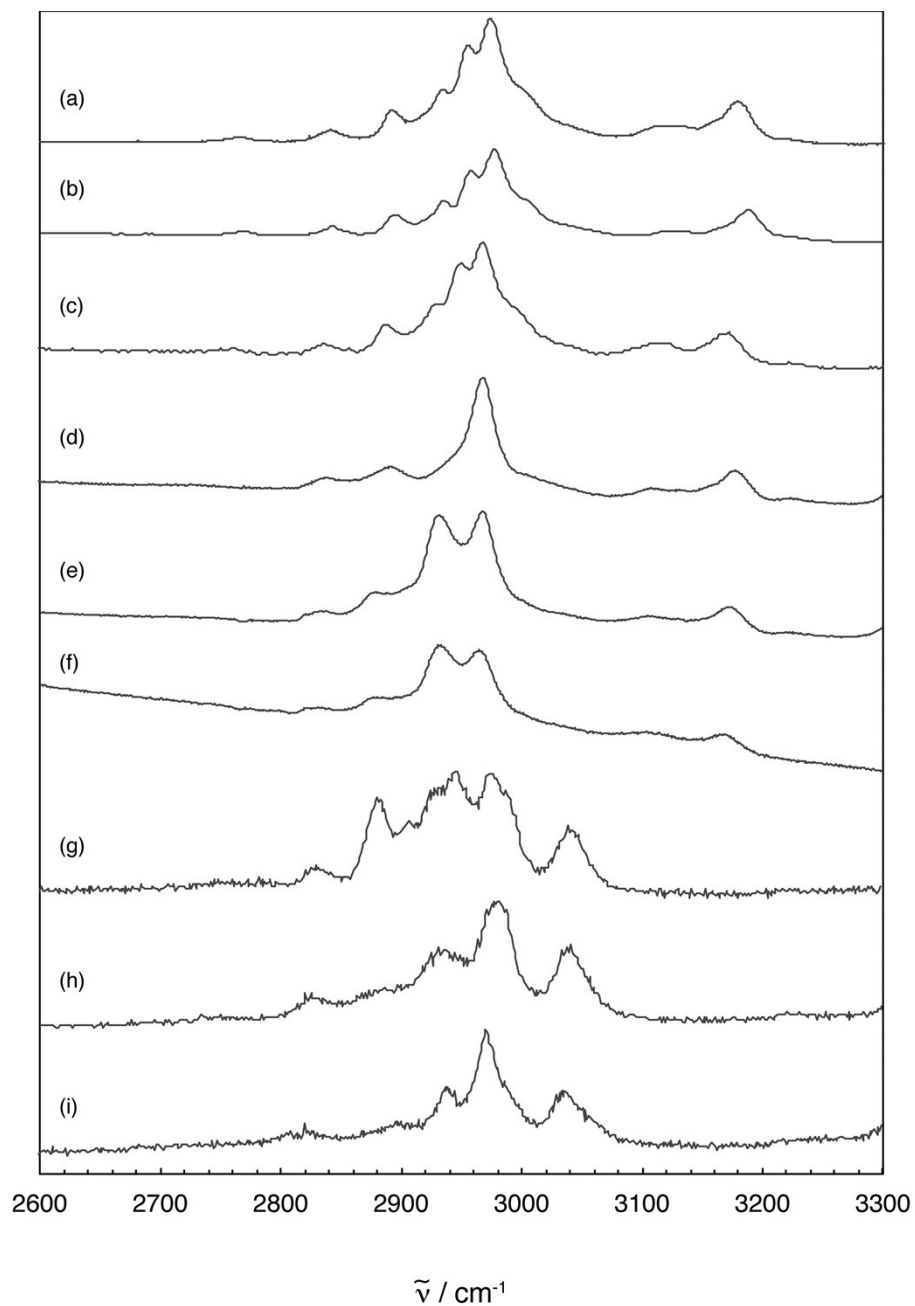

**Fig. S10** Raman spectra ( $2600\text{-}3300\text{ cm}^{-1}$ ) for the  $\text{NH}_3$ -saturated ILs at  $p_1=0.101\text{ MPa}$  and  $313.2\text{ K}$ . (a), [emim][Tf<sub>2</sub>N]; (b), [emim][FAP]; (c), [emim][TfO]; (d), [2OHmim][Tf<sub>2</sub>N]; (e), [4SO<sub>3</sub>Hmim][Tf<sub>2</sub>N]; (f), [4SO<sub>3</sub>Hmim][Tf<sub>2</sub>N] ( $p_1=0.0101\text{ MPa}$ ); (g), [N<sub>1114</sub>][Tf<sub>2</sub>N]; (h), [N<sub>111,2OH</sub>][Tf<sub>2</sub>N]; (i), [N<sub>111,1COOH</sub>][Tf<sub>2</sub>N].
